# Supplementary material for: Reshaped as polyester-based nanoparticles, gallic acid inhibits platelet aggregation, reactive oxygen species production and multi-resistant Gram-positive bacteria with an efficiency never obtained
Source: PubMed Central journal article supplement — Nanoscale Adv. 2019 Sep 18;1(10):4148–57. doi: 10.1039/c9na00441f (PMC9419547; doi:10.1039/c9na00441f), 2019-09-18
Supplement: NA-001-C9NA00441F-s001.pdf [file NA-001-C9NA00441F-s001.pdf]

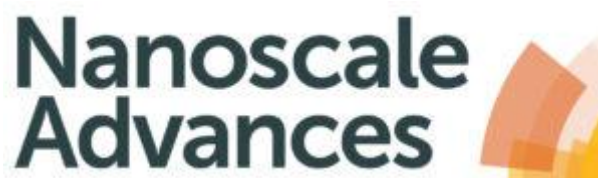

## Electronic Supplementary Material

### **Reshaped as polyester-based nanoparticles, gallic acid inhibits platelet aggregation, reactive oxygen species production and multi-resistant Gram-positive bacteria with an ever-achieved efficiency**

Silvana Alfei,<sup>\*,a</sup> Maria Grazia Signorello,<sup>a</sup> Anna Schito,<sup>b</sup> Silvia Catena,<sup>a</sup> Federica Turrini<sup>a</sup>

<sup>a</sup>*Dipartimento di Farmacia (DiFAR), Università degli studi di Genova, Viale Cembrano 4, I-16148 Genova (ITALY)*

<sup>b</sup>*Dipartimento di Scienze Chirurgiche e Diagnostiche Integrate (DISC), Università degli studi di Genova, Viale Benedetto XV, 6, I-16132 Genova (ITALY)*

\*Correspondence Author: Prof. Silvana Alfei

Department of Pharmacy, University of Genoa

Phone number: +39-010-3532296

Fax number: +39-010-3532684

Email: [alfei@difar.unige.it](mailto:alfei@difar.unige.it)

ORCID: 0000-0002-4630-4371

# Table of Contents

Scheme S1: Synthetic pathway for preparation of GA-enriched dendrimer (GAD) **9**

Scheme S2: Synthesis of Gallic acid derivative **7** suitable for esterification of the dendrimer scaffold **4**

Figure S1: Structure of fifth generation dendron **2** (Scheme S1)

Section S1: Synthetic procedures for preparing dendrimers **3** and **4**

Section S2: Synthetic procedures for preparing compounds **5**, **6** and **7**

Section S3: Synthetic procedures for preparing GA-dendrimer **9** via dendrimer **8**

Section S4.1 Characterization of compounds **3-7** and **9**

*Table S4.1.1: Significant physicochemical data of isolated compounds*

*Figure S4.1.1-S4.1.3: Spectra of GAD (9)*

Section S4.2 Evaluation of cytotoxicity of GAD (**9**)

*Table S4.2.1: GAD particle hydrodynamic size (DLS) at 25 °C and cell viability values ( $\pm$  standard deviation) from cytotoxicity essay at GAD concentration of 340  $\mu\text{g mL}^{-1}$ .*

Section S5: Radical Scavenging Activity (RSA %) of dendrimer **9**

*Fig. S5.1: RSA % curves versus mM concentrations*

*Table S5.1: IC<sub>50</sub> values determined by us (9, GA, AA and Trolox) or reported ( $\alpha$ -tocopherol) versus mM concentrations*

Section S6: Terpenoids and essential oils conservative activity of GAD (**9**)

$\beta$ -pinene terpenoid

*Fig. S6.1:  $\beta$ -pinene oxidative degradation profiles with and without additives as FTIR peaks areas ratio in function of time*

*Fig. S6.2: Comparison between Peroxide Value (PV) obtained by iodometric titration of samples of  $\beta$ -pinene with and without additives at the end of thermally induced oxidation process*

*Fig. S6.3: Analysis of Principal Components (PCA) on FTIR data*

Pinus mugo essential oil (PEO)

*Fig. S6.4: PEO Oxidative degradation profiles as FTIR peaks areas ratio in function of time*

*Fig. S6.5: PEO Oxidative degradation profiles as Peroxide Value (PV) in function of time*

*Fig. S6.6: Analysis of Principal Components on FTIR data*

*Table S6.1: PV value*

Section S7: Comparison between ROS and platelet aggregation inhibition activity of GAD and GA

*Fig. S7.1: Platelet aggregation inhibition activity*

*Fig. S7.2: ROS production inhibition activity*

References

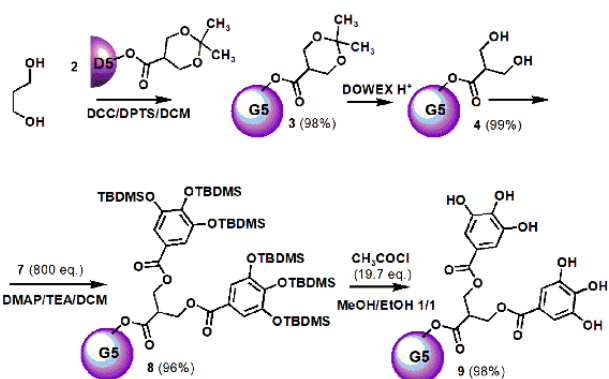

**Scheme S1.** Synthetic pathway to prepare GAD (9)<sup>1</sup>

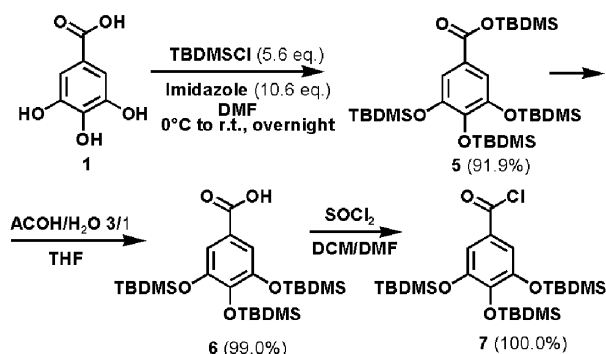

**Scheme S2.** Synthesis of GA derivative 7<sup>1</sup>

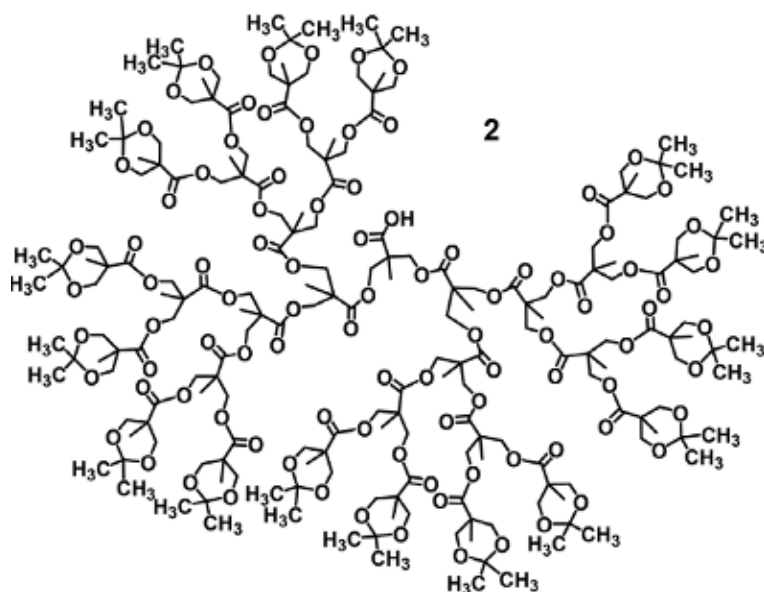

**Figure S1.** Structure of the fifth generation dendron 2<sup>2</sup>

## Section S1

### Synthesis of dendrimer 3<sup>1</sup>

A solution made of a mixture of dendrimer 2 (2.64 g, 0.6199 mmol), 1, 3-propanediol (0.0214 g, 0.2818 mmol, 20.4  $\mu$ l) and DPTS (0.1244 g, 0.4227 mmol) in CH<sub>2</sub>Cl<sub>2</sub> (8 ml) was treated with dicyclohexylcarbodiimide (DCC) (0.1454 g, 0.7045 mmol) dissolved in DCM (3 ml) at room temperature under N<sub>2</sub> and magnetic stirring for 24 h. The precipitated dicyclohexylurea (DCU) was removed by filtration and washed with CH<sub>2</sub>Cl<sub>2</sub>. Filtrate and washings were combined, concentrated at reduced pressure and taken with ethyl acetate (EtOAc) to make precipitate DPTS which was filtered and washed with EtOAc. The solvent was removed at reduced pressure to give the crude dendrimer 3 (2.78 g) which was submitted to a careful column chromatography to eliminate traces N-acylureic adduct of 2 highlighted by IR analysis and performed as follows. Dendrimer 3 was dissolved in the minimum quantity of a mixture petroleum ether/EtOAc=1:1 and passed through a short silica gel column (h=20 cm,  $\phi$ =2 cm) using the same mixture of solvents (100 ml) collecting 1 ml fractions up to disappearance of IR bands at 2118 cm<sup>-1</sup> (DCC) and at 1648, 1527 cm<sup>-1</sup> (N-acylureic adduct of 2). The chromatography was developed with petroleum ether/EtOAc=2:3 (100 ml) and completed with the mixture 1:4 (100 ml) and EtOAc 100% (200 ml) collected as a single fraction. The removal of the solvent at reduced pressure afforded 3 as glassy off-white solid which was brought to constant weight under vacuum (2.34 g, 0.2700 mmol, 98%).

### **Synthesis of dendrimer 4<sup>1</sup>**

A solution of **3** (2.34 g, 0.2700 mmol) in MeOH (22 ml) was treated with four spatula tips of acid resin Dowex 50 WX2-200 at room temperature with magnetic stirring for 24 h. The resins were removed by filtration and washed with fresh MeOH. Filtrate and washings were combined, concentrated at reduced pressure to give a pink glassy solid which was left under magnetic stirring overnight in excess of dry Et<sub>2</sub>O, filtered to give **4** as a pink hygroscopic solid (2.40 g) which was further purified by dissolution in H<sub>2</sub>O (80 ml), centrifuged to remove insoluble residues and freeze-dried to obtain **4** as fluffy highly hygroscopic white solid (1.94 g, 0.270, 99 % isolated yield) which was stored in a dryer on P<sub>2</sub>O<sub>5</sub>.

## **Section S2**

### **Synthesis of tert-Butyldimethylsilyl 3,4,5-tri[(tert-butyldimethylsilyl)oxy]benzoate (5)<sup>1</sup>**

Commercial Gallic Acid (GA) **1** (0.3987 g, 2.34 mmol), imidazole (10 equiv., 1.60 g, 23.40 mmol) and recently bought TBDMSCI (5.6 equiv., 1.98 g, 13.10 mmol) were dissolved in DMF (6 ml) at room temperature under N<sub>2</sub> and maintained under magnetic stirring overnight. The reaction was stopped when the GA spot was no longer found in TLC (cyclohexane/EtOAc 4/1). Rf. GA = 0; Rf. **5** = 0.84. The suspension was diluted with Et<sub>2</sub>O and the organic phase was washed with water (3 x 16 ml). Once separated from aqueous phase, the organic one was dried on MgSO<sub>4</sub>. After solvent removal **5** was obtained as sticky colourless resin (1.35 g, 2.15 mmol, 91.9 %, net of traces of impurities found with NMR analysis).

### **Synthesis of 3,4,5-tri[(tert-butyldimethylsilyl)oxy]benzoic acid (6)<sup>1</sup>**

Compound **5** (1.20 g, 1.91 mmol) was dissolved in 35 ml of THF at room temperature. A 3:1 mixture of AcOH-H<sub>2</sub>O (48 ml) was then added to the solution and the mixture was stirred at room temperature for 24 hours. The reaction was stopped when the **5** spot was no longer found in TLC (cyclohexane/EtOAc 4/1). The reaction mixture was poured into ice-cold H<sub>2</sub>O (80 ml) and the product was extracted with EtOAc (3 x 40 ml), washed with brine (2 x 40 ml), dried over MgSO<sub>4</sub> and concentrated in vacuo to give crude **6** as white solid smelling of acetic acid. It was then recrystallized from MeOH obtaining in two successive precipitates the purified **6** as odorless white crystals (0.9400 g, 1.89 mmol, 99.0 % isolated yield).

### **Synthesis of 3,4,5-tri[(tert-butyldimethylsilyl)oxy]benzoyl chloride (7)<sup>1</sup>**

Compound **6** (0.9300 g, 1.81 mmol) was dissolved in DCM (7.2 ml), cooled to 0°C and added with SOCl<sub>2</sub> (0.8613 g., 7.24 mmol, 0.5211 ml), catalytic DMF (3 drops) and allowed to reach room temperature. The reaction was monitored by FTIR analysis and was stirred until the disappearance of C=OOH peak at 1680 cm<sup>-1</sup> with concomitant appearance of a peak at 1759 cm<sup>-1</sup> (C=OCl). After 2 h at room temperature, the solvent was removed obtaining a waxy brown solid with a pungent smell. It was washed first with toluene and then with *n*-hexane, eliminating from time to time insoluble dark pitches and obtaining **7** as a pale yellow waxy solid. Its level of purity was early tested by TLC (cyclohexane/EtOAc 10/1) and, since it was very good, **7** was used in the subsequent reaction without further purification (0.9600, 1.81 mmol, 100% yield).

## **Section S3**

### **Synthesis of GA-dendrimer 9 via dendrimer TBDMS-GA-dendrimer 8<sup>1</sup>**

#### *Esterification reaction of dendrimer 4 with 7*

A solution of dendrimer **4** (0.1593 g, 0.0219 mmol), DMAP (0.0027 g, 0.0219 mmol) and TEA (0.2074 g, 2.05 mmol, 0.2860 ml) in DCM (3 ml) cooled to 0° C, was dropwise added with chloride acid **7** (0.9282 g, 1.75 mmol) in turn dissolved in DCM (2 ml). Once reached the room temperature the reaction mixture was stirred overnight. A TLC (cyclohexane/EtOAc 10/1) was performed to evaluate the reaction status. Only traces of unreact **7** were detected while the FTIR spectrum of a small hydrolyzed sample showed both the peak of the C=OO group (around 1733 cm<sup>-1</sup>) of **4** scaffold and the C=OO peak of the conjugate ester type (1723 cm<sup>-1</sup>) indicating the occurrence of peripheral functionalization. At the same time the band relative to the OH groups of **4** was strongly diminished. The reaction mixture was hydrolyzed with 10% KHSO<sub>4</sub> (10 ml), extracted with DCM (3 x 15 ml) and dried over MgSO<sub>4</sub>. After evaporation of the solvent, the dendrimer functionalized with protected GA **8** was obtained as an orange glassy solid (0.8179, 0.021 mmol, 95.5 yield). Compound **8** was subjected to deprotection reaction without further purification.

### Removal of TBDMS protecting groups from **8**: synthesis of GA-loaded dendrimer **9**<sup>1</sup>

A solution of crude dendrimer **8** (1.00 g, 0.0256 mmol) in MeOH/EtOH 1/1 (20 ml) cooled to 0°C, was treated with a strong excess of acetyl chloride (4 eq./TBDMS group, 1.54 g, 19.7 mmol, 1.4 ml) and was stirred for 5 h at r.t. The reaction was stopped and the solvent removed. The obtained residue was dissolved in EtOAc (40 ml) and the organic solution was washed with 15% NaOH (3 x 30 ml) to remove low molecular weight phenolic compounds (mainly unbound GA residue) and the organic phase was dried over MgSO<sub>4</sub>. Once removed the solvent, the dark glassy residue was taken up with EtOAc (q.s.), the neutral pH was lowered with HCl at pH = 2 observing a considerable solution clarification. The organic phase was washed with water and dried again. After removal of the solvent, **9** was obtained as a highly hygroscopic brownish glassy solid carefully stored in a dryer on P<sub>2</sub>O<sub>5</sub> and under vacuum (0.4252 g, 0.0250, 97.6% yield). As early qualitative investigation, the FeCl<sub>3</sub> essay for phenols recognition was performed to confirm the presence of free phenol groups.

#### FeCl<sub>3</sub> essay

Approximately 1 ml of 5% ethanol solution of **9** pale yellow colored was placed in a test tube and was treated with 2-3 drops of 5% FeCl<sub>3</sub> prepared fresh. A strong green coloring indicating the presence of phenolic groups was observed (Figure S 3.1).

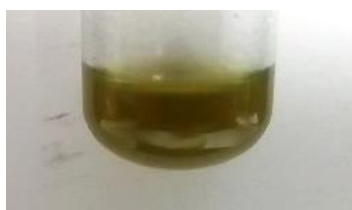

Fig. S3.1 Green coloring obtained in the FeCl<sub>3</sub> test performed on **9** solution

## Section S4.1

### Characterization data of compounds 3-9<sup>1</sup>

#### FT-IR and NMR spectra data of compounds 3-9

**Dendrimer 3.** FTIR (KBr, cm<sup>-1</sup>): 2992, 2939, 2878 (CH<sub>3</sub> and CH<sub>2</sub>), 1748 (C=O). <sup>1</sup>H NMR (300 MHz, CDCl<sub>3</sub>), δ (ppm): 1.12, 1.17, 1.26 (s signals, 186H, CH<sub>3</sub> of generations), 1.33 (s, 96H, CH<sub>3</sub> acetonide), 1.40 (s, 96H, CH<sub>3</sub> acetonide), CH<sub>2</sub> propandiol, probably overlapped, 3.60 (d, 64H, *J* = 11.8 Hz, CH<sub>2</sub>O acetonide), 3.71-3.91 (m, 4H, CH<sub>2</sub>O propandiol), 4.13 (d, 64H, *J* = 11.7 Hz, CH<sub>2</sub>O acetonide), 4.25-4.34 (m, 120H, CH<sub>2</sub>O generations). <sup>13</sup>C NMR (75.5 MHz, CDCl<sub>3</sub>) δ (ppm): 173.48, 171.80 (C=O), 98.12 (quaternary C of acetonide), 67.29, 65.95, 65.90, 64.83 (CH<sub>2</sub>O), 49.11, 46.82, 46.70 (quaternary C of three generations), 42.03 (quaternary C of fourth generation), 25.24 (CH<sub>3</sub> of acetonide), 22.00 (CH<sub>3</sub> of acetonide), 18.49, 17.68 (CH<sub>3</sub> of generation). Found: C, 57.05; H, 7.18. C<sub>409</sub>H<sub>637</sub>O<sub>188</sub> requires C, 57.41; H, 7.44%.

**Dendrimer 4.** FTIR (KBr, cm<sup>-1</sup>): 3433 (OH), 2933, 1733 (C=O). <sup>1</sup>H NMR (300 MHz, DMSO-*d*<sub>6</sub>), δ (ppm): 1.01, 1.16, 1.18, 1.23, 1.34 (five s signals, 186H, CH<sub>3</sub> of generations), 1.70 (m, 2H, CH<sub>2</sub> propandiol), 3.52 (dd, 128H, CH<sub>2</sub>OH), 3.56 (partially overlapped signal, 2H, CH<sub>2</sub>O propandiol), 3.98 (partially overlapped signal, 2H, CH<sub>2</sub>O propandiol), 4.08-4.18 (m, 120H, CH<sub>2</sub>O of four generations), 4.37 (br s, 64H, OH). <sup>13</sup>C NMR (75.5 MHz, DMSO-*d*<sub>6</sub>) δ (ppm): 173.94, 171.73 (C=O), 64.27, 63.55 (CH<sub>2</sub>O), 50.13 (quaternary C of fifth generation), 46.12 (other generation detectable quaternary C), 17.05, 16.61 (CH<sub>3</sub> of generations). Found: C, 51.71; H, 7.01. C<sub>313</sub>H<sub>504</sub>O<sub>188</sub> requires C, 51.67; H, 6.98%.

**tert-Butyldimethylsilyl 3,4,5-tri[(tert-butyldimethylsilyl)oxy]benzoate (5).** TLC: R<sub>f</sub> = 0.84 (cyclohexane/EtOAc 4/1). FTIR (KBr, cm<sup>-1</sup>): 2933, 2861 (CH<sub>3</sub> and CH<sub>2</sub>), 1703 (C=O), 1258, 1092. <sup>1</sup>H NMR (300 MHz, CDCl<sub>3</sub>), δ (ppm): [0.017 and 0.10 (two s, CH<sub>3</sub>Si, impurities)], 0.14 (s, 6H), 0.24 (s, 12H), 0.36 (s, 6H), [0.87 and 0.92 (two s, CH<sub>3</sub> t-Buthyl, impurities)], 0.95 (s, 18H), 0.99 (s, 9H), 1.01 (s, 9H), 7.23 (s, 2H). <sup>13</sup>C NMR (75.5 MHz, CDCl<sub>3</sub>) δ (ppm): 166.31, 148.31, 143.18, 123.26, 115.95, 26.19, 26.12, [25.70 and 25.66 (impurities)], 25.60, 18.82, 18.48, [18.13

(impurity)], 17.70, [-2.94 (impurity)], -3.58, [-3.64 (impurity)], -3.89, -4.80. Found: C, 59.00; H, 10.02; Si, 12.78. C<sub>31</sub>H<sub>62</sub>O<sub>5</sub>Si<sub>4</sub> requires C, 59.39; H, 9.98; Si, 12.77%.

**3,4,5-tri[(tert-butyl dimethylsilyl)oxy]benzoic acid (6)**. TLC: R<sub>f</sub> = 0.44 (cyclohexane/EtOAc 4/1). m.p. 237°C [lit. 1: m.p. 230°C (MeOH)]. FTIR (KBr, cm<sup>-1</sup>): 3650-3100 (OH), 2933, 2900, 2861 (CH<sub>3</sub> and CH<sub>2</sub>), 1687 (C=OOH), 1259, 1086. <sup>1</sup>H NMR (300 MHz, CDCl<sub>3</sub>) δ (ppm): 0.15 (s, 6H), 0.25 (s, 12H), 0.96 (s, 18H), 1.00 (s, 9H), 7.29 (s, 2H); <sup>13</sup>C-NMR (75.5 MHz, CDCl<sub>3</sub>) δ (ppm): 172.01, 148.49, 144.07, 121.07, 116.12, 26.19, 26.11, 18.82, 18.51, -3.63, -3.88. Found: C, 58.58; H, 9.40; Si, 16.00. C<sub>25</sub>H<sub>48</sub>O<sub>5</sub>Si<sub>3</sub> requires C, 58.56; H, 9.44; Si, 16.38%.

**3,4,5-tri[(tert-butyl dimethylsilyl)oxy]benzoyl chloride (7)**. TLC: R<sub>f</sub> = 0.80 (cyclohexane/EtOAc 10/1). FTIR (KBr, cm<sup>-1</sup>): 2932, 2860 (CH<sub>3</sub> and CH<sub>2</sub>), 1759 (C=OCl). <sup>1</sup>H-NMR (300 MHz, CDCl<sub>3</sub>) δ (ppm): 0.15 (s, 6H), 0.26 (s, 12H), 0.96 (s, 9H), 0.99 (s, 18H), 7.32 (s, 2H). <sup>13</sup>C NMR (75.5 MHz, CDCl<sub>3</sub>) δ (ppm): 167.11, 148.76, 145.92, 124.65, 117.42, 26.14, 26.00, 18.86, 18.53, -3.67, -3.87. Found: C, 56.22; H, 9.05; Cl, 7.00; Si, 16.02. C<sub>25</sub>H<sub>47</sub>ClO<sub>4</sub>Si<sub>3</sub> requires C, 56.53; H, 8.93; Cl, 6.68; Si, 15.81%.

#### TBDMS-GA-loaded dendrimer **8**

Not purified product. TLC: R<sub>f</sub> = 0.70 (cyclohexane/EtOAc 10/1). FTIR (KBr, cm<sup>-1</sup>): 2958, 2932, 2897, 2860 (CH<sub>3</sub> and CH<sub>2</sub>), 1741 (C=OO inner matrix), 1726 (peripheral conjugated C=OOGA), 1259, 1093.

#### GA-loaded dendrimer **9**

FTIR (KBr, cm<sup>-1</sup>): 2932, 2899, 2861 (CH<sub>3</sub> and CH<sub>2</sub> dendrimer matrix), 1741 (C=OO inner matrix), 1726 (peripheral conjugated C=OOGA). <sup>1</sup>H NMR (300 MHz, DMSO-*d*<sub>6</sub>) δ (ppm): 1.01, 1.16, 1.18, 1.23, 1.34 (five s signals, 186H, CH<sub>3</sub> of generations), 1.70 (m, 2H, CH<sub>2</sub> propandiol), 3.95 (m, 128H, GA esterified CH<sub>2</sub>O), 4.05-4.40 (m, 120H, CH<sub>2</sub>O of four generations), 7.32 (s, 128H, GA phenyl CH=), 8.00-10.00 (br s, GA phenols OH). <sup>13</sup>C NMR (75.5 MHz, DMSO-*d*<sub>6</sub>) δ (ppm): 173.94, 171.73 (C=O of dendrimer scaffold), 167.11 (C=O of GA), 148.80, 145.94, 124.67 (quaternary C of phenyl), 117.41 (CH= of phenyl), 64.27, 63.55 (CH<sub>2</sub>O), 50.13 (quaternary C of fifth generation), 46.12 (other generation detectable quaternary C), 17.05, 16.61 (CH<sub>3</sub> of generations). Found: C, 54.03; H, 4.89. C<sub>761</sub>H<sub>760</sub>O<sub>444</sub> requires C, 53.72; H, 4.51%.

#### Elemental analysis data of compounds **3-7** and **9**<sup>1</sup>

**Table S4.1.1**

Elemental Analysis data and other physicochemical data of the isolated reported compounds

| Compound | Formula                                                          | MW                    | Required (%) | Found (%) | Error (%) | Physical state                          |
|----------|------------------------------------------------------------------|-----------------------|--------------|-----------|-----------|-----------------------------------------|
| <b>3</b> | C <sub>409</sub> H <sub>632</sub> O <sub>188</sub> <sup>a</sup>  | 8557.28 <sup>a</sup>  | C 57.41      | C 57.05   | C 0.36    | Glassy<br>Off-white<br>solid            |
|          |                                                                  |                       | H 7.44       | H 7.18    | H 0.26    |                                         |
| <b>4</b> | C <sub>313</sub> H <sub>504</sub> O <sub>188</sub> <sup>a</sup>  | 7275.24 <sup>a</sup>  | C 51.67      | C 51.71   | C 0.04    | Fluffy white<br>hygroscopic<br>solid    |
|          |                                                                  |                       | H 6.98       | H 7.01    | H 0.03    |                                         |
| <b>5</b> | C <sub>31</sub> H <sub>62</sub> O <sub>5</sub> Si <sub>4</sub>   | 626.37                | C 59.39      | C 59.00   | C 0.39    | Viscous resin                           |
|          |                                                                  |                       | H 9.98       | H 10.02   | C 0.04    |                                         |
|          |                                                                  |                       | Si 12.77     | Si 12.78  | H 0.01    |                                         |
| <b>6</b> | C <sub>25</sub> H <sub>48</sub> O <sub>5</sub> Si <sub>3</sub>   | 512.90                | C 58.56      | C 58.58   | C 0.02    | White crystals                          |
|          |                                                                  |                       | H 9.44       | H 9.40    | H 0.04    |                                         |
|          |                                                                  |                       | Si 16.38     | Si 16.00  | Si 0.38   |                                         |
| <b>7</b> | C <sub>25</sub> H <sub>47</sub> ClO <sub>4</sub> Si <sub>3</sub> | 531.35                | C 56.53      | C 56.22   | C 0.31    | Pale yellow<br>waxy solid               |
|          |                                                                  |                       | H 8.93       | H 9.05    | H 0.12    |                                         |
|          |                                                                  |                       | Cl 6.68      | Cl 7.00   | Cl 0.32   |                                         |
| <b>9</b> | C <sub>761</sub> H <sub>760</sub> O <sub>444</sub> <sup>a</sup>  | 17010.02 <sup>a</sup> | Si 15.81     | Si 16.02  | Si 0.21   | Brownish glassy<br>hygroscopic<br>solid |
|          |                                                                  |                       | C 53.72      | C 54.03   | C 0.31    |                                         |
|          |                                                                  |                       | H 4.51       | H 4.89    | H 0.38    |                                         |

<sup>a</sup> Estimated by <sup>1</sup>H NMR spectra and confirmed by Elemental Analysis in order to avoid the routine well known but very expensive MALDI-TOF technique not available in our laboratory.

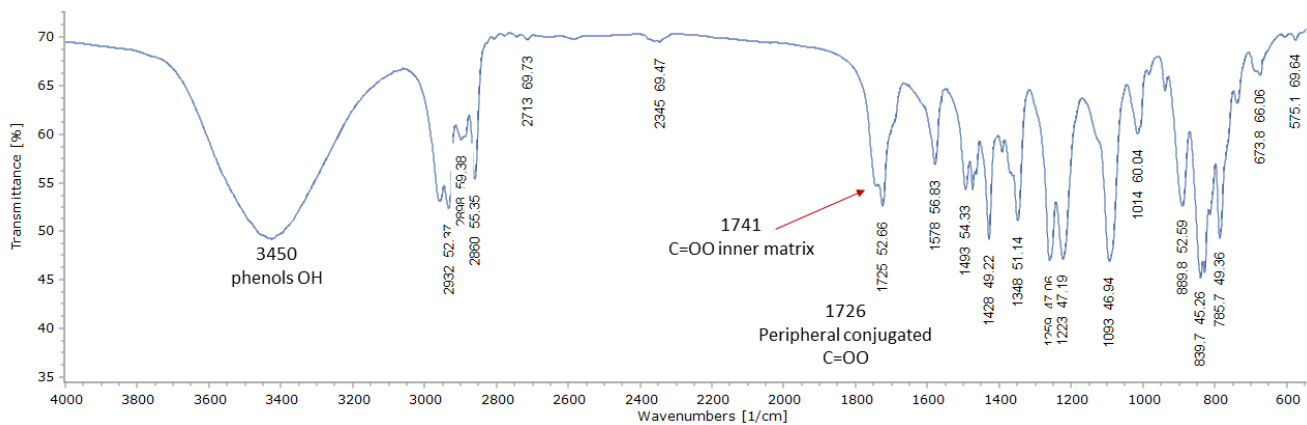

**Fig. S4.1.1** FTIR spectrum (KBr) of GA-dendrimer **9**

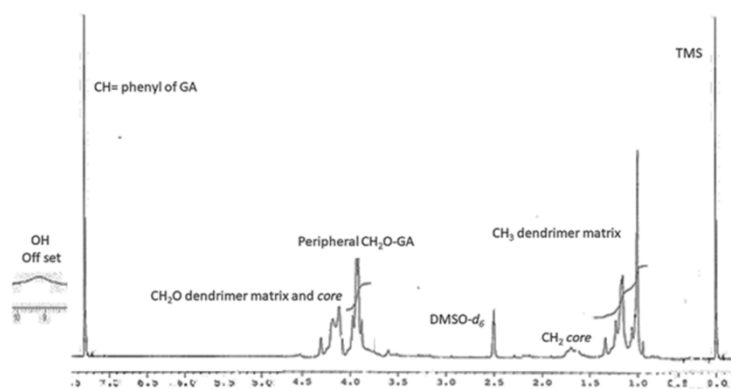

**Fig. S4.1.2**  $^1\text{H}$  NMR spectrum ( $\text{CDCl}_3$ , 300 MHz) of GA dendrimer **9**

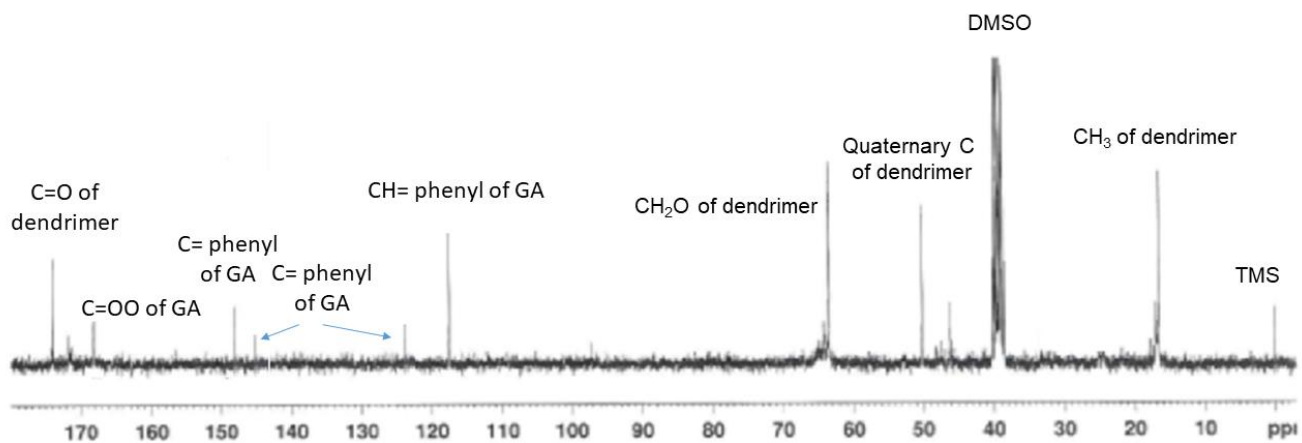

**Fig. S4.1.3**  $^{13}\text{C}$  NMR and DEPT-135 spectra ( $\text{CDCl}_3$ , 75.5 MHz) of GA dendrimer **9**

## Section S4.2

### Evaluation of cytotoxicity of GAD (9)<sup>1</sup>

#### Cell culture

B14 cells (*Cricetulus griseus*, ATCC, CCL-14.1, Sigma-Aldrich Inc.) were grown in high-glucose Dulbecco's modified Eagle medium with 10 % (v/v) fetal bovine serum (FBS) and 4 mM glutamine; BRL 3A (*Rattus norvegicus*, ATCC, CRL-1442, Sigma-Aldrich Inc.) were grown in Ham's F12 medium with 10% (v/v) FBS and 2 mM glutamine. All media were supplemented with 0.1% (w/v) penicillin and 0.1% (w/v) streptomycin. The cells were maintained in culture flasks in a 37 ° C humidified atmosphere of 5% CO<sub>2</sub>/95 % air (incubator) and passaged every 2–3 days. Cells were harvested and used in experiments after obtaining 80–90 % confluence. The number of viable cells was determined by trypan blue exclusion with a haemo-cytometer. Then cells were suspended in media at a concentration of  $1.0 \times 10^{-5}$  cells per mL and plated in flat-bottom 96-well plates. Plates with cells were incubated for 24 h at 37 ° C in a humidified atmosphere of 5% CO<sub>2</sub> to allow adherence of the cells before the administration of dendrimers.

#### 3-(4, 5-Dimethylthiazol-2-yl)-2,5-diphenyltetrazolium bromide (MTT) assay

Cytotoxicity of GAD **9** was assayed with MTT. After 24 h incubation when cells attached on 96-well plates they were treated with dendrimer GAD at a concentration from 0.5 to 20 μmol/L (dimethylsulfoxide). After 24 h incubation, a 20 μL solution of MTT in phosphate-buffered saline (5 mg/mL) was added to each well. Four hours later the medium was removed and the formazan precipitate dissolved in dimethylsulfoxide for absorbance measurement at 580 nm and reference at 700 nm. The cell viability was related to the control wells containing untreated cells with fresh cell culture medium and was calculated according to the following Equation (1):

$$\text{Cell viability (\%)} = \frac{\text{Absorption test}}{\text{Absorption control}} \times 100 \quad (1)$$

The result is presented as the mean of three measurements ( $\pm$  standard deviation).

#### Statistical analyses

Data are expressed as means  $\pm$  standard deviation. Statistical significance of differences was determined by one-way analysis of variances (ANOVA).  $P < 0.05$  was considered statistically significant.

**Table S4.2.1**

GAD particle hydrodynamic size (DLS) at 25 °C and cell viability values ( $\pm$  standard deviation) from cytotoxicity essay at GAD concentration of 340 μg mL<sup>-1</sup>.<sup>1</sup>

| Z-AVE size (nm) <sup>a</sup> | Cell viability (%) <sup>b</sup> |                |
|------------------------------|---------------------------------|----------------|
|                              | B14                             | BRL            |
| 348.6 $\pm$ 2.8              | 91.4 $\pm$ 3.5                  | 85.3 $\pm$ 1.1 |

<sup>a</sup>N (degree of freedom) = 12; <sup>b</sup>N (degree of freedom) = 3



## Section S5

### Radical Scavenging Activity (RSA%) of dendrimer **9**<sup>1</sup>

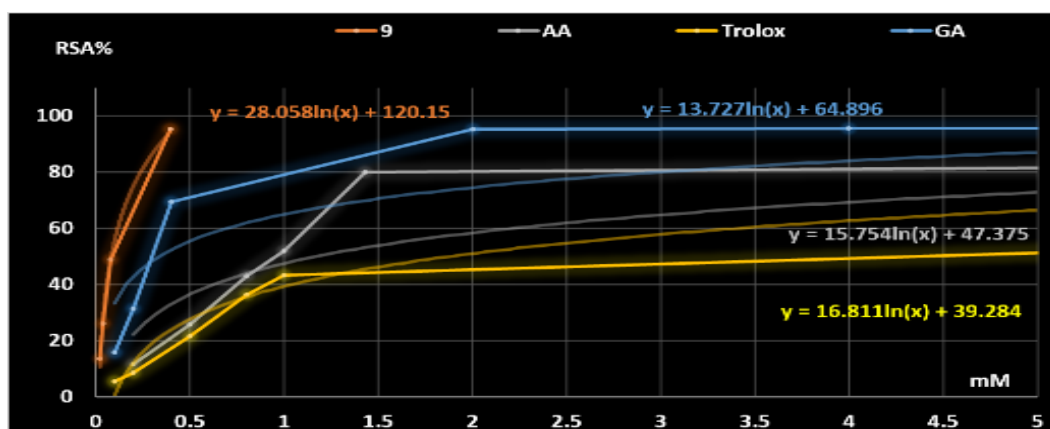

**Fig. S5.1** RSA (%) curves recorded at different **9**, GA, AA and Trolox concentrations in ethanol or water solution: concentrations were given in mM. The corresponding exponential tendency curves and related equations used to derive the IC<sub>50</sub> were also provided.

**Table S5.1**

Comparison between RSA (%) expressed as IC<sub>50</sub> (mM), of **9**, GA, AA, Trolox<sup>1</sup> and α-Tocopherol.<sup>3</sup>

| Entry (MW)                           | IC <sub>50</sub> (μg ml <sup>-1</sup> ) | IC <sub>50</sub> (μmol ml <sup>-1</sup> ) <sup>e</sup> | IC <sub>50</sub> (mM) <sup>e</sup> |
|--------------------------------------|-----------------------------------------|--------------------------------------------------------|------------------------------------|
| <b>9</b> <sup>a,b</sup> (17010.017)  | 1395.8                                  | 0.0821                                                 | 0.08                               |
| GA <sup>a,b</sup> (170.12)           | 57.4                                    | 0.3378                                                 | 0.34                               |
| AA <sup>a,c</sup> (176.12)           | 208.1                                   | 1.1813                                                 | 1.18                               |
| Trolox <sup>a,c</sup> (250.29)       | 473.4                                   | 1.8916                                                 | 1.89                               |
| α-Tocopherol <sup>d</sup><br>(430.7) | 96.0                                    | 0.2230                                                 | 0.22                               |

<sup>a</sup> From DPPH test performed by us. <sup>b</sup> In ethanol. <sup>c</sup> In water. <sup>d</sup> Lit. <sup>e</sup> Calculated from concentration expressed in μg ml<sup>-1</sup>.

Section S6

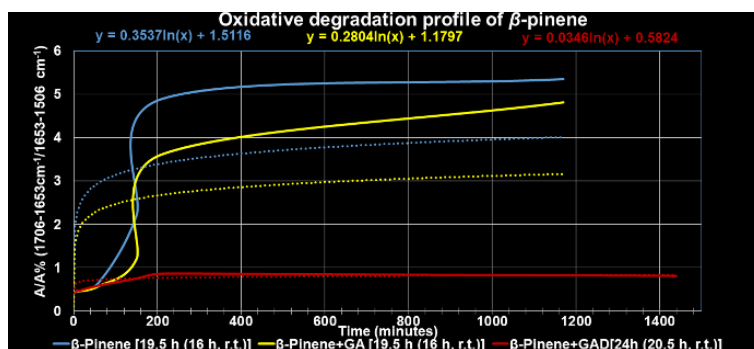

**Fig. S6.1**  $\beta$ -pinene oxidative degradation profiles with and without additives as FTIR peaks areas ratio as function of time.<sup>4</sup>

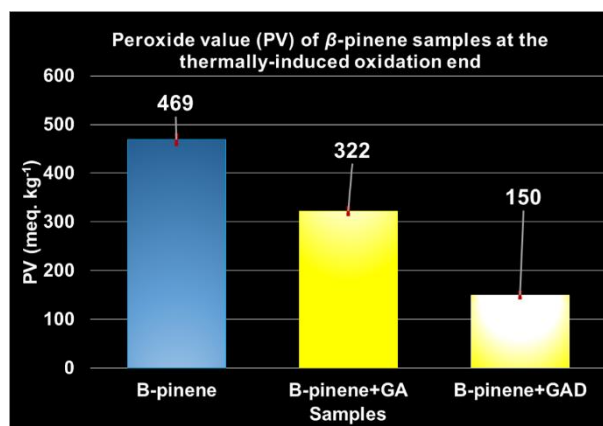

**Fig. S6.2** PV obtained by iodometric titration of samples of  $\beta$ -pinene with and without additives at the end of thermally-induced oxidation process.<sup>4</sup>

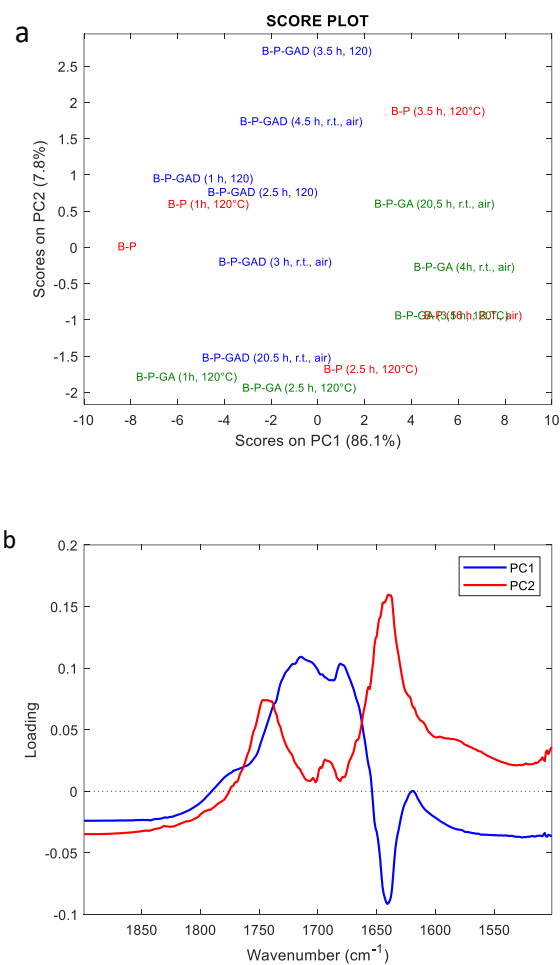

**Fig. S6.3** PCA score plot (a) and loading plot (b) concerning  $\beta$ -P: PC1 vs. PC2.  $\beta$ -P samples in blue, GA samples in green, GAD samples in red.<sup>4</sup>

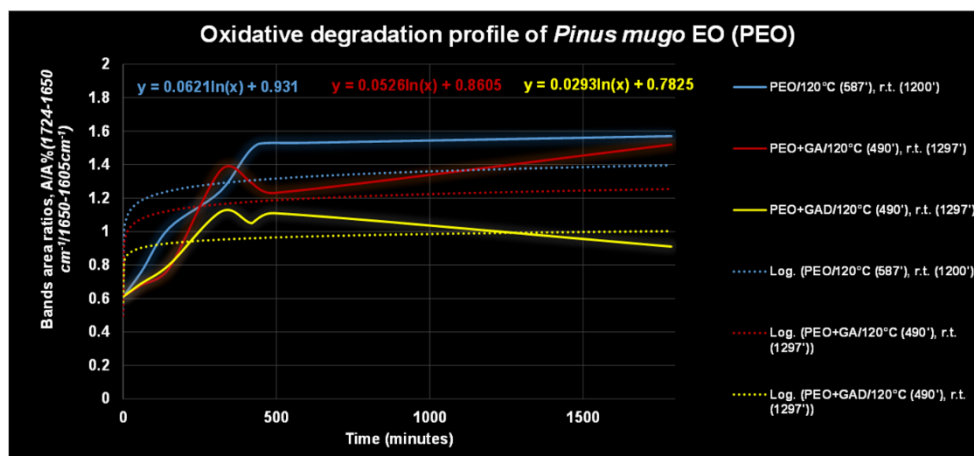

**Fig. S6.4** PEO oxidative degradation profiles as FTIR peaks areas ratio (range 1700-1506  $cm^{-1}$ ) in function of time.<sup>4</sup>

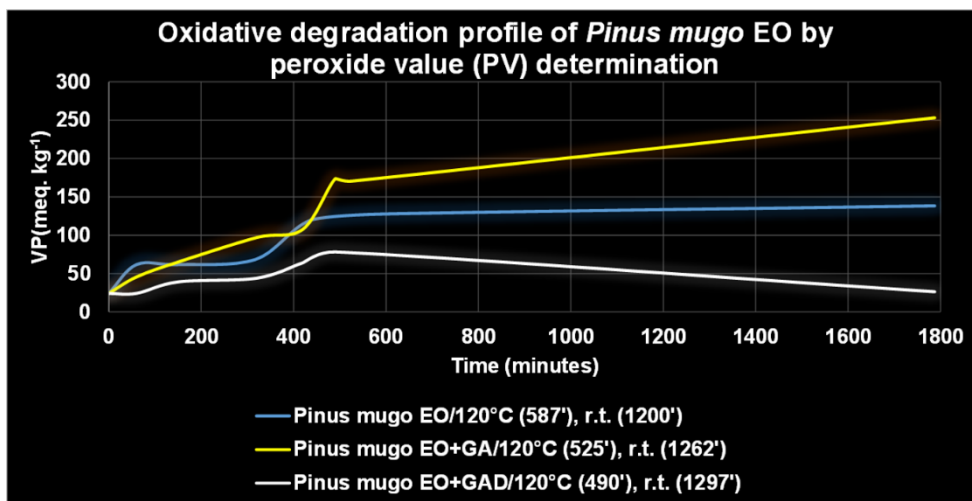

**Fig. S6.5** PEO Oxidative degradation profiles as Peroxide Value (PV) in function of time.<sup>4</sup>

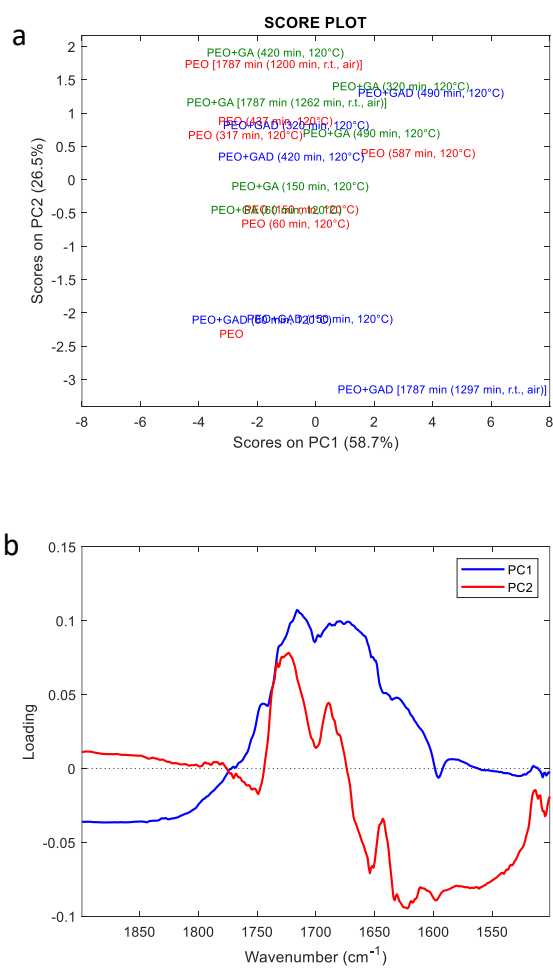

**Fig. S6.6** PCA score plot (a) and loading plot (b) concerning PEO: PC1 vs. PC2. PEO samples in red, GA samples in green, GAD samples in blue.<sup>4</sup>

**Table S6.1**PV determination at fixed time points for all samples and comparison estimate efficiency of GA and GAD<sup>4</sup>

| Time (min) | PV (meq. Kg <sup>-1</sup> ) |           |         |                 |                     |                      |
|------------|-----------------------------|-----------|---------|-----------------|---------------------|----------------------|
|            | PEO                         | PEO+GA    | PEO+GAD | $\beta$ -pinene | $\beta$ -pinene +GA | $\beta$ -pinene +GAD |
| 0          | 24±0.78                     | 24±0.78   | 24±0.78 |                 |                     |                      |
| 26         |                             |           |         |                 |                     |                      |
| 50         |                             |           |         |                 |                     |                      |
| 60         | 61±0.70                     | 45. ±0.55 | 24±0.50 |                 |                     |                      |
| 140        |                             |           |         |                 |                     |                      |
| 150        | 61±0.75                     | 65±0.82   | 39±0.60 |                 |                     |                      |
| 206        |                             |           |         |                 |                     |                      |
| 240        |                             |           |         |                 |                     |                      |
| 312        |                             |           |         |                 |                     |                      |
| 317        | 68±0.65                     |           |         |                 |                     |                      |
| 320        |                             | 97±0.54   | 44±0.54 |                 |                     |                      |
| 330        |                             |           |         |                 |                     |                      |
| 420        |                             | 107±0.75  | 64±0.80 |                 |                     |                      |
| 437        | 119±0.90                    |           |         |                 |                     |                      |
| 456        |                             |           |         |                 |                     |                      |
| 490        |                             | 173±0.88  | 78±0.85 |                 |                     |                      |
| 525        |                             | 170±0.95  |         |                 |                     |                      |
| 587        | 127±0.88                    |           |         |                 |                     |                      |
| 1170       |                             |           |         | 469±2.05        | 322±1.54            |                      |
| 1440       |                             |           |         |                 |                     | 150±0.98             |
| 1787       | 138±0.72                    | 253±1.21  | 26±0.45 |                 |                     |                      |

**Section S7**

Comparison between ROS and platelet aggregation inhibition activity of GAD and GA

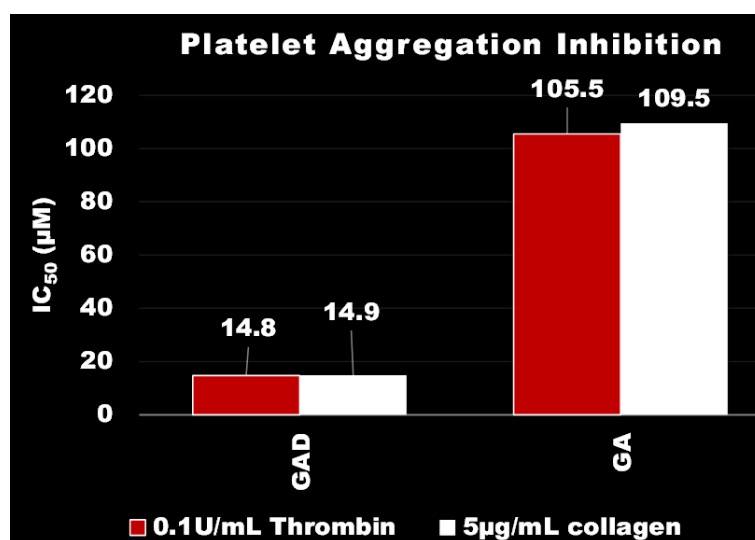**Fig. S7.1** Platelet aggregation inhibition activity of GAD and GA expressed as IC<sub>50</sub> (µM).

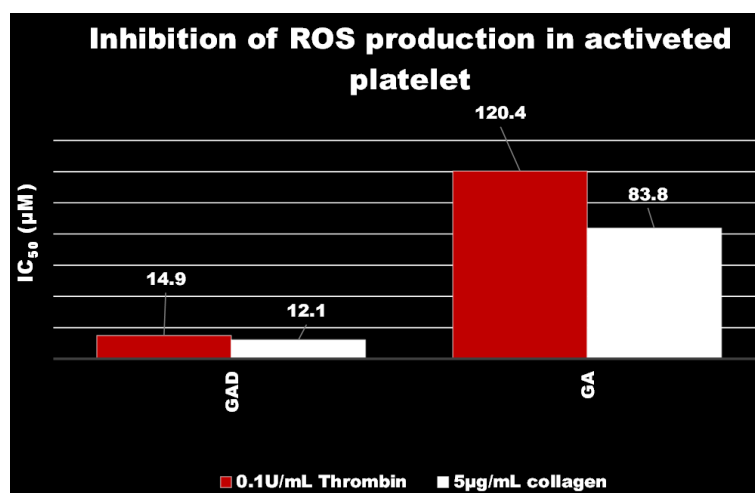

**Fig. S7.2** ROS production inhibition activity of GAD and GA expressed as IC<sub>50</sub> (µM).

#### References

- 1 S. Alfei, S. Catena and F. Turrini, *Drug Deliv. Transl. Res.*, 2019, ID: DDTR-D-19-00157, under review.
- 2 S. Alfei and S. Castellaro, *Macromol. Res.*, 2017, **25**, 1172.
- 3 H. Mohamada, F. Abasa, D. Permana, N. H. Lajisa, A. M. Alib, M. A. Sukaric, T. Y. Y. Hin, H. Kikuzaki and N. Nakatani, (Zingiberaceae). *Zeitschrift fur Naturforschung*, 2004, **59**, 811.
- 4 S. Alfei, P. Oliveri and C. Malegori. *ChemistrySelect*, 2019, **4**, 8891 –8901.
